# Supplementary material for: Variability of bulb morpho-geometrical properties in onion (Allium cepa L.) germplasm collections, using digital imaging tools
Source: PeerJ journal article supplement (doi:10.7717/peerj.19583), 2025-08-08
Supplement: Raw_data.xlsx [file Raw_data.xlsx]

## Sheet: Table S1
							Table S1. Quantitative and qualitative traits measured on the 29 onion accessions
		Polar Diameter	Equitorial Diameter	Aspect Ratio	Transverse Diameter	Thickness of Neck	Shape Index	Sphericity	Geometric Mean Diameter	Arithmetric Mean Diameter	Surface area	Frontal Surface Area	Cross Sectional Area	Bulb size	Position of Maximum Diameter of Bulb	Bulb Neck Width	Bulb Shape (Longitudinal section	Shape of Stem End	Shape at Root End	Base Color of Dry Skin	Hue of Color of Dry Skin	Tendency to Split into Bulblets	Degree of Spliting into Bulblets
S/N	Accession	PD	ED	Ra	T	TN	SHI	STY	Dgm	Dam	Sa	Af.s	Ac.s	BSZ	BPMD	BNW	BSH	SSE	SRE	BCDS	HCDS	TSB	DSB
1	230013	8.626	6.52167	1.32367	6.48367	2.118	0.872391	1.07485	7.12916	7.21044	159.701	44.2003	40.8412	Medium	Middle	Medium	Broad elliptic	Rounded	Weakly tapered	Red	Reddish	Medium	Medium
2	230061	7.214	6.35367	1.14521	5.803	1.726	0.980828	0.997817	6.4146	6.45689	129.98	36.1494	32.9179	Medium	Towards stem end	Broad	Circular	Slightly raised	Rounded	Brown	Brownish	Medium	Medium
3	230157	9.645	5.88367	1.63693	7.41267	1.83367	0.696921	1.24706	7.47726	7.64711	177.133	44.9333	46.3323	Medium	Middle	Narrow	Elliptic	Strongly slopping	Strongly tapered	Brown	Brownish	Strong	Strong
4	230182	8.78267	6.37833	1.37973	6.771	1.93667	0.827359	1.11399	7.22229	7.31067	163.921	44.0044	41.988	Medium	Middle	Broad	Broad elliptic	Slightly raised	Rounded	Brown	Brownish	Medium	Medium
5	230310	10.2987	8.40367	1.2306	7.26667	2.74467	0.973085	0.9997	8.54388	8.65633	229.361	67.8717	58.8593	Medium	Towards stem end	Broad	Circular	Slightly raised	Rounded	Red	Reddish	Very Strong	Very Strong
6	230353	10.6123	7.907	1.34246	8.19467	2.55067	0.848311	1.0924	8.80537	8.90467	243.615	65.9202	62.2849	Medium	Middle	Very narrow	Broad elliptic	Rounded	Rounded	White	Absent	Medium	Medium
7	230368	6.45633	7.007	0.921135	4.86367	1.843	1.2577	0.84531	6.01976	6.109	114.177	35.5641	29.3981	Medium	Towards stem end	Broad	Transverse medium elliptic	Flat	Rounded	Red	Reddish	Very Strong	Very Strong
8	230372	9.21367	7.37467	1.25113	7.58067	2.06567	0.882868	1.06524	7.99763	8.05633	201.04	53.3639	50.9993	Medium	Middle	Medium	Broad elliptic	Rounded	Rounded	Green	Greenish	Medium	Medium
9	230630	10.8997	9.09633	1.20261	8.23367	2.47233	0.959277	1.00578	9.32262	9.40989	274.026	78.0394	69.7761	Medium	Middle	Broad	Broad ovate	Rounded	Rounded	Brown	Brownish	Medium	Medium
10	230646	10.2857	8.28667	1.24312	8.06467	2.525	0.910329	1.04239	8.80323	8.879	244.253	67.1082	62.1103	Medium	Middle	Medium	Broad elliptic	Rounded	Rounded	Brown	Brownish	Medium	Medium
11	23P57	8.456	7.23	1.16957	6.535	1.66033	0.972715	0.998672	7.34884	7.407	169.765	48.0708	43.1176	Small	Middle	Broad	Circular	Rounded	Rounded	Yellow	Yellowish	Medium	Medium
12	23C56	10.743	8.16867	1.32219	8.263	2.07867	0.869662	1.07897	8.95559	9.05822	252.137	68.8622	64.4888	Medium	Middle	Broad	Circular	Slightly raised	Rounded	Red	Reddish	Medium	Medium
13	23C68	11.9977	10.1957	1.18005	9.515	2.69367	0.959578	1.00875	10.4841	10.5694	345.674	95.9251	87.8369	Medium	Middle	Broad	Circular	Rounded	Rounded	Brown	Brownish	Medium	Medium
14	23V28	9.86733	9.39767	1.05833	7.711	1.98733	1.08352	0.934704	8.90779	8.992	249.346	72.6435	63.519	Medium	Towards stem end	Broad	Circular	Rounded	Rounded	Red	Reddish	Very Strong	Very Strong
15	23P15	9.31867	6.405	1.45464	7.47567	2.004	0.767992	1.16881	7.62491	7.73311	182.753	46.8949	46.9982	Medium	Middle	Medium	Broad elliptic	Slightly slopping	Strongly tapered	Brown	Brownish	Medium	Medium
16	23P114	8.87467	7.96333	1.11486	6.87633	2.09233	1.01925	0.967242	7.84566	7.90478	193.641	55.5739	49.1415	Medium	Towards stem end	Narrow	Rhombic	Flat	Weakly tapered	White	Absent	Very Strong	Very Strong
17	23P121	6.48233	4.96933	1.3048	5.31933	1.58167	0.8465	1.09868	5.5443	5.59033	97.3039	25.4828	24.7311	Small	Middle	Medium	Broad elliptic	Rounded	Weakly tapered	Brown	Brownish	Medium	Medium
18	23P127	4.731	4.35367	1.08594	3.686	1.47767	1.05091	0.957804	4.22394	4.25689	56.3473	16.2223	14.3057	Small	Towards root end	Narrow	Rhombic	Slightly raised	Rounded	Pink	Pinkish	Weak	Weak
19	G23008	8.46933	6.69267	1.26687	6.731	1.62067	0.886749	1.06296	7.23736	7.29767	164.657	44.5267	41.853	Medium	Middle	Medium	Circular	Slightly raised	Weakly tapered	Yellow	Greenish	Medium	Medium
20	23013	9.68433	7.29333	1.32743	7.80433	2.026	0.840049	1.10062	8.1805	8.26067	210.547	55.5427	53.6795	Medium	Middle	Medium	Broad elliptic	Rounded	Rounded	Brown	Brownish	Medium	Medium
21	No. 20, 9-2	10.508	9.68567	1.08684	8.97967	2.05267	1.00085	0.980003	9.67621	9.72444	294.383	79.855	74.3332	Medium	Towards stem end	Broad	Circular	Rounded	Rounded	Brown	Brownish	Very Strong	Very Strong
22	No. 100, 31-1	10.7953	8.379	1.2903	8.63967	2.50967	0.871934	1.07557	9.18398	9.27133	265.614	71.0595	67.682	Medium	Middle	Medium	Broad elliptic	Rounded	Weakly tapered	Red	Reddish	Medium	Medium
23	No. 200, 9-2	5.816	5.35933	1.091	4.849	1.15033	1.01194	0.979716	5.3133	5.34144	88.8285	24.4635	22.443	Small	Middle	Broad	Circular	Rounded	Rounded	Red	Pinkish	Weak	Weak
24	WHTIEONE-1	9.08333	7.68967	1.1796	7.59433	2.22333	0.932609	1.02943	8.07247	8.12244	205.708	54.9771	52.0758	Medium	Middle	Broad	Circular	Rounded	Rounded	White	Absent	Medium	Medium
25	SWEET GREEN	9.632	6.84833	1.41486	7.859	2.28733	0.78894	1.15185	8.00947	8.11311	201.878	51.7765	51.785	Medium	Middle	Very narrow	Broad elliptic	Slightly slopping	Weakly tapered	Green	Greenish	Medium	Medium
26	Eom Ji-nara	9.67133	8.927	1.0863	7.63433	2.26133	1.03932	0.955359	8.68036	8.74422	236.948	67.8497	60.1144	Medium	Towards stem end	Broad	Circular	Rounded	Rounded	Red	Reddish	Very Strong	Very Strong
27	Hong Ban-jang	11.0307	8.40433	1.31346	9.084	2.51133	0.83971	1.0994	9.42053	9.50633	279.527	73.019	71.1613	Medium	Middle	Very narrow	Broad elliptic	Slightly raised	Strongly tapered	Red	Reddish	Medium	Medium
28	WHITE ONE	10.56	8.28633	1.27378	7.673	2.21033	0.921673	1.03356	8.73447	8.83978	240.007	68.8156	61.4695	Medium	Towards stem end	Narrow	Circular	Slightly raised	Rounded	White	Absent	Medium	Medium
29	Wolmi Hwang	9.42333	7.21567	1.30848	7.476	2.013	0.862226	1.08443	7.95899	8.03833	199.322	53.4372	50.8355	Medium	Middle	Very narrow	Broad elliptic	Rounded	Strongly tapered	Brown	Brownish	Medium	Medium
