# Supplementary material for: Variability of bulb morpho-geometrical properties in onion (Allium cepa L.) germplasm collections, using digital imaging tools
Source: PeerJ journal article supplement (doi:10.7717/peerj.19583), 2025-08-08
Supplement: Table_S1.docx [file Table_S1.docx]

Table S1. Details of onion germplasm used in the study

| **Germplasm** | **Code** | **Germplasm** | **Code** | **Germplasm** | **Code** |
| --- | --- | --- | --- | --- | --- |
| 230013 | 1 | 23P57 | 11 | No. 20, 9-2 | 21 |
| 230061 | 2 | 23C56 | 12 | No. 100, 31-1 | 22 |
| 230157 | 3 | 23C68 | 13 | No. 200, 9-2 | 23 |
| 230182 | 4 | 23V28 | 14 | WHTIEONE-1 | 24 |
| 230310 | 5 | 23P15 | 15 | SWEET GREEN | 25 |
| 230353 | 6 | 23P114 | 16 | Eom Ji-nara | 26 |
| 230368 | 7 | 23P121 | 17 | Hong Ban-jang | 27 |
| 230372 | 9 | 23P127 | 18 | WHITE ONE | 28 |
| 230630 | 9 | G23008 | 19 | Wolmi Hwang | 29 |
| 230646 | 10 | 23013 | 20 |  |  |
