# Supplementary material for: Variability of bulb morpho-geometrical properties in onion (Allium cepa L.) germplasm collections, using digital imaging tools
Source: PeerJ journal article supplement (doi:10.7717/peerj.19583), 2025-08-08
Supplement: Table_S3.docx [file Table_S3.docx]

Table S3. Formula used for estimating geometrical properties of onion bulbs

| Geometrical trait | Formula | Reference |
| --- | --- | --- |
| Aspect ratio (Ra) |  | (Gautam 2021) |
| Shape index (SHI) |  | (Gautam 2021; Kaveri & Thirupathi 2015) |
| Sphericity (STY) |  | (Gautam 2021; Kaveri & Thirupathi 2015) |
| Geometric mean diameter (Dgm) |  | (Gautam 2021; Kaveri & Thirupathi 2015) |
| Arithmetic mean diameter (Dam) |  | (Gautam 2021; Kaveri & Thirupathi 2015) |
| Surface area (Sa) |  | (Gautam 2021) |
| Frontal surface area |  | (Gautam 2021; Kaveri & Thirupathi 2015) |
| Cross sectional area |  | (Gautam 2021; Kaveri & Thirupathi 2015) |

PD: Polar diameter, ED: Equatorial diameter, T: Transverse diameter or bulb thickness
